# Supplementary material for: Thickness-dependent mobility in two-dimensional MoS2transistors
Source: Royal Society of Chemistry journal article supplement (doi:10.1039/c4nr06331g), 2015-01-01
Supplement: c4nr06331g1.pdf [file c4nr06331g1.pdf]

# Supporting Information

## for

### Thickness-Dependent Mobility in Two-Dimensional MoS<sub>2</sub> Transistors

D. Lembke, A. Allain, A. Kis\*

*Electrical Engineering Institute, Ecole Polytechnique Federale de Lausanne (EPFL),  
CH-1015 Lausanne, Switzerland*

*\*Correspondence should be addressed to: Andras Kis, andras.kis@epfl.ch*

#### 1. Device Characteristics

In the table below, the following device characteristics are specified: device label, number (#) of layers, SiO<sub>2</sub> substrate unpolished or polished, length ( $L$ ), voltage probe spacing ( $L_{xx}$ ), width ( $W$ ), aspect ratio ( $L_{xx}/W$ ) as well as MoS<sub>2</sub> area ( $L_{xx} \cdot W$ ) exposed to ambient.

| Label         | # | Polished? | $L$<br>[μm] | $L_{xx}$<br>[μm] | $W$<br>[μm] | $L_{xx}/W$ | $L_{xx} \cdot W$<br>[μm <sup>2</sup> ] |
|---------------|---|-----------|-------------|------------------|-------------|------------|----------------------------------------|
| 130805 03 V   | 1 | no        | 7.0         | 4.0              | 2.4         | 1.66       | 16.8                                   |
| 130807 26 II  | 1 | yes       | 3.2         | 1.4              | 1.3         | 1.08       | 4.2                                    |
| 130808 28 VI  | 1 | yes       | 6.1         | 3.7              | 2.4         | 1.54       | 14.6                                   |
| 130807 21 III | 2 | yes       | 2.9         | 1.0              | 2.4         | 0.42       | 7.0                                    |
| 130818 17 I   | 2 | no        | 5.4         | 3.4              | 2.4         | 1.42       | 13.0                                   |
| 130819 31 II  | 2 | no        | 3.8         | 1.4              | 2.4         | 0.58       | 9.1                                    |
| 130807 20 I   | 3 | yes       | 4.2         | 1.8              | 1.3         | 1.38       | 5.5                                    |
| 130819 31 II  | 3 | no        | 7.0         | 4.0              | 2.4         | 1.67       | 16.8                                   |

## 2. Conductance of All Devices

The evolution of four-probe conductance during the process of cleaning and exposing to ambient for all characterized devices as listed in Section 1.

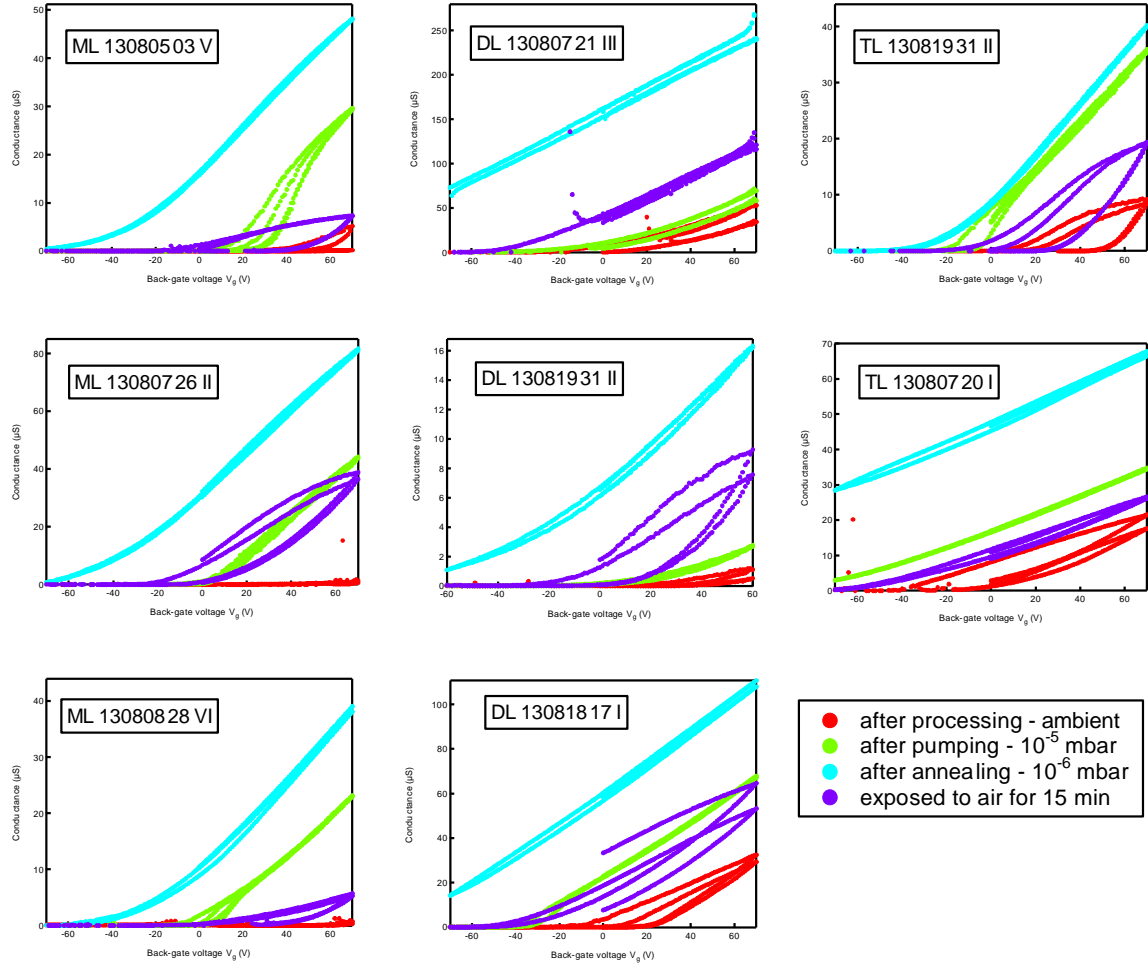

**Figure SI 1. Evolution of four-probe conductance during the process of cleaning and exposing to ambient.** The four shown steps are: right after fabrication in ambient (red), in vacuum ( $\sim 1 \times 10^{-5}$  mbar) before overnight annealing (green), in vacuum ( $\sim 1 \times 10^{-6}$  mbar) after overnight annealing (blue) at  $120^\circ\text{C}$  and after  $\sim 15$  minutes of exposure to ambient (purple).

### 3. Mobility of All Devices

The evolution of mobility during the process of cleaning and exposing to ambient for all characterized devices as listed in Section 1.

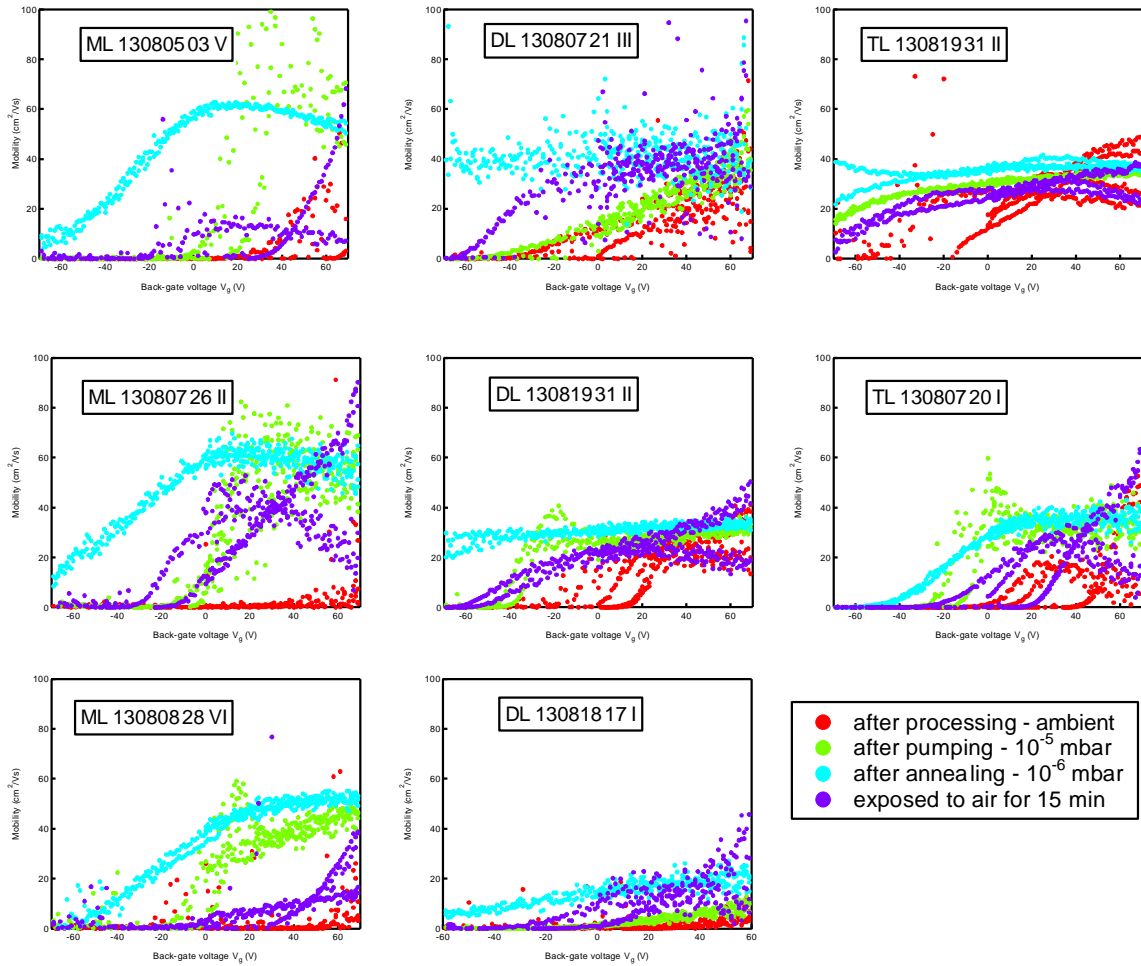

**Figure SI 2. Evolution of mobility during the process of cleaning and exposing to ambient.** The four shown steps are: right after fabrication in ambient (red), in vacuum ( $\sim 1 \times 10^{-5}$  mbar) before overnight annealing (green), in vacuum ( $\sim 1 \times 10^{-6}$  mbar) after overnight annealing (blue) at 120 °C and after  $\sim 15$  minutes of exposure to ambient (purple).

#### 4. Student t-Test

We perform a statistical t-test and formulate our null-hypothesis as: “The band mobility in monolayer devices is lower than in devices based on two and three layer thick MoS<sub>2</sub>“. The test is based on the following statistics:

| Label         | # | $\mu_{\text{band}} [\text{cm}^2 \cdot \text{V}^{-1} \text{s}^{-1}]$ |
|---------------|---|---------------------------------------------------------------------|
| 130805 03 V   | 1 | 62.7                                                                |
| 130807 26 II  | 1 | 61.2                                                                |
| 130808 28 VI  | 1 | 52.8                                                                |
| 130807 21 III | 2 | 43.5                                                                |
| 130818 17 I   | 2 | 19.6                                                                |
| 130819 31 II  | 2 | 32.1                                                                |
| 130807 20 I   | 3 | 35.4                                                                |
| 130819 31 II  | 3 | 36.9                                                                |

We deduce a mean value  $\bar{x}_1$  of  $58.9 \text{ cm}^2 \cdot \text{V}^{-1} \text{s}^{-1}$  for the monolayer FETs and  $\bar{x}_2$  of  $33.5 \text{ cm}^2 \cdot \text{V}^{-1} \text{s}^{-1}$  for FETs based on thicker layers. The standard deviations of our sample sets are  $\bar{s}_1 = 5.4 \text{ cm}^2 \cdot \text{V}^{-1} \text{s}^{-1}$  and  $\bar{s}_2 = 8.8 \text{ cm}^2 \cdot \text{V}^{-1} \text{s}^{-1}$ , respectively. The t-value is given by

$$t = \frac{\bar{x}_1 - \bar{x}_2}{\sqrt{\frac{s_1^2}{N_1} + \frac{s_2^2}{N_2}}}$$

The degree of freedom d.f. of this test is given by the Welch–Satterthwaite equation

$$d.f. = \frac{\left(\frac{s_1^2}{N_1} + \frac{s_2^2}{N_2}\right)^2}{\frac{\left(\frac{s_1^2}{N_1}\right)^2}{N_1-1} + \frac{\left(\frac{s_2^2}{N_2}\right)^2}{N_2-1}}$$

With this, we calculate a t-value of 5.1 and a d.f. of 5.9. By comparing these values with the theoretical z-score we can reject our initial hypothesis that the monolayer device has a lower mobility than thicker ones with a probability of error of less than 0.5%. In other words, we can say that the mobility of our monolayer MoS<sub>2</sub> devices is higher than the other devices with a confidence of at least 99.5%.

## 5. Ultra-flat SiO<sub>2</sub> Substrate

The SiO<sub>2</sub> substrate of ~half of the devices was intentionally chemically and mechanically polished by using a commercial CMP machine (Alpsitec E460) to establish an ultra-flat substrate prior to exfoliation. The polishing of SiO<sub>2</sub> results in an ultra-smooth substrate and the RMS value of the surface height can be reduced from a value of 230 pm in the unpolished SiO<sub>2</sub> to 119 pm in the polished surface.

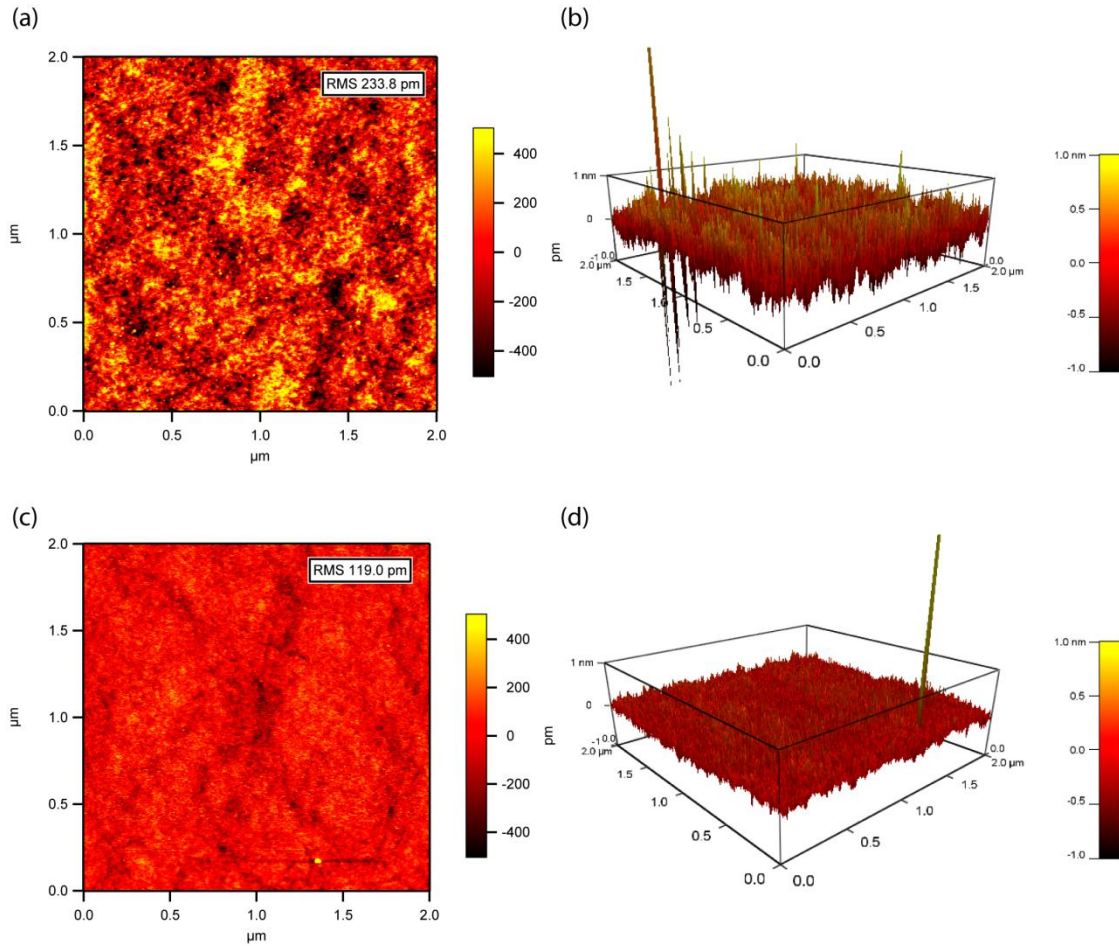

**Figure SI 3. Morphology of the SiO<sub>2</sub> substrate.** (a) AFM image ( $2 \times 2 \mu\text{m}^2$ ) of the unpolished SiO<sub>2</sub> surface. The RMS of this surface is 233.8 pm. (b) 3D representation of the image in (a). (c) AFM image ( $2 \times 2 \mu\text{m}^2$ ) of the polished SiO<sub>2</sub> surface after CMP treatment, exhibiting a RMS of 119.0 pm. (d) 3D representation of the image in (c).
